# Supplementary material for: Rigid versus flexible anilines or anilides confirm the bicyclic ring as the hydrophobic portion for optimal σ2receptor binding and provide novel tools for the development of future σ2receptor PET radiotracers
Source: Royal Society of Chemistry journal article supplement (doi:10.1039/c6ra15783a), 2016-01-01
Supplement: c6ra15783a1.pdf [file c6ra15783a1.pdf]

## Supplemental Information

**“Rigid *versus* flexible anilines or anilides confirm the bicyclic ring as the hydrophobic portion for optimal  $\sigma_2$  receptor binding and provide novel tools for the development of future  $\sigma_2$  receptor PET radiotracer”**

**Authors:** Niso Mauro<sup>‡</sup>, Maria Laura Pati<sup>‡</sup>, Francesco Berardi<sup>‡</sup>, Carmen Abate<sup>\*‡</sup>

<sup>‡</sup>*Dipartimento di Farmacia-Scienze del Farmaco, Università degli Studi di Bari ALDO MORO, Via Orabona 4, I-70125 Bari, Italy*

### Table of contents

Synthesis of intermediate compounds **3a-c**, **9a-c**; table of elemental analyses, table of physical properties of novel compounds.

### General procedure for the synthesis of 3-Chloro-*N*-Phenylpropanamides (3a-c).

One of the appropriate anilines (2.5 mmol) was dissolved in anhydrous CH<sub>2</sub>Cl<sub>2</sub> (10 mL) and after cooling at 0 °C, Et<sub>3</sub>N (1 mmol, 0.13 mL) was added under a stream of N<sub>2</sub>. 3-Chloropropionyl chloride was then added to the solution in a dropwise manner, and the resulting mixture was stirred for 2 h at 0 °C. The solution was then quenched with H<sub>2</sub>O and extracted with CH<sub>2</sub>Cl<sub>2</sub> (3 × 10 mL). The collected organic layers were dried (Na<sub>2</sub>SO<sub>4</sub>) and evaporated under reduced pressure to afford a crude solid, which was used for the next step without purification (75 % yield).

**3-Chloro-*N*-phenylpropanamides (3a):** GC-MS *m/z* 185 (M<sup>+</sup> + 2, 10), 183 (M<sup>+</sup>, 30), 93 (100).

**3-Chloro-*N*-3-methoxyphenylpropanamides (3b):** GC-MS *m/z* 215 (M<sup>+</sup> + 2, 10), 213 (M<sup>+</sup>, 35), 123 (100). IR cm<sup>-1</sup>: 3300, 3090, 1664, 1610.

**3-Chloro-*N*-4-fluorophenylpropanamides (3c):** GC-MS *m/z* 203 (M<sup>+</sup> + 2, 10), 201 (M<sup>+</sup>, 30), 111 (100).

### General procedures for the synthesis of alkyl chloride derivatives (9a-c)

To a suspension of NaH (0.16 g, 6.80 mmol) in dry DMF (15 mL), a solution in DMF (5 mL) of the appropriate 3,4-dihydroquinolin-2(1*H*)-one (**8a-c**) (2.7 mmol), was added in a dropwise manner, at 0 °C under a stream of N<sub>2</sub>. After 30 min, 1-bromo-3-chloropropane (3 mmol, 0.29 mL) was added in a dropwise manner and the mixture was allowed to warm to room temperature and was stirred for 4 h. After cooling to 0 °C H<sub>2</sub>O was added and the solvent was removed under reduced pressure. The residue was taken up with water and extracted with CH<sub>2</sub>Cl<sub>2</sub> (3 × 15 mL). The organic layers were collected, dried over Na<sub>2</sub>SO<sub>4</sub> and evaporated under reduced pressure to afford a crude residue as a brown solid.

**1-(3-Chloropropyl)-3,4-dihydroquinolin-2(1*H*)-one (9a)** was purified by column chromatography with CH<sub>2</sub>Cl<sub>2</sub>/AcOEt (8:2) as eluent to provide a yellow oil (0.33 g, 55%); GC-MS *m/z* 225 (M<sup>+</sup> + 2, 15), 223 (M<sup>+</sup>, 45), 188 (55), 132 (100).

**1-(3-Chloropropyl)-5-methoxy-3,4-dihydroquinolin-2(1*H*)-one (9b)** the crude residue was used for the next step with no purification (0.39 g, 58%); GC-MS  $m/z$  255 ( $M^+ + 2$ , 25), 253 ( $M^+$ , 75), 218 (85), 162 (100).

**1-(3-Chloropropyl)-6-fluoro-3,4-dihydroquinolin-2(1*H*)-one (9c)** was purified by column chromatography with  $\text{CH}_2\text{Cl}_2/\text{AcOEt}$  (9:1) as eluent to provide a colorless oil (0.42 g, 65%); GC-MS  $m/z$  243 ( $M^+ + 2$ , 15), 243 ( $M^+$ , 45), 206 (60), 150 (100).

**Table of Elemental Analyses**

|                 | <b>Calculated</b> |          |          | <b>Found</b> |          |          |
|-----------------|-------------------|----------|----------|--------------|----------|----------|
| <b>Compound</b> | <b>C</b>          | <b>H</b> | <b>N</b> | <b>C</b>     | <b>H</b> | <b>N</b> |
| <b>4a</b>       | 63.74             | 6.69     | 7.43     | 63.56        | 6.70     | 7.34     |
| <b>4b</b>       | 61.99             | 6.69     | 6.88     | 62.10        | 6.73     | 7.00     |
| <b>4c</b>       | 60.83             | 6.13     | 7.09     | 61.10        | 6.30     | 7.12     |
| <b>5a</b>       | 70.15             | 7.07     | 7.01     | 70.30        | 7.20     | 7.11     |
| <b>5b</b>       | 58.13             | 7.09     | 6.46     | 58.02        | 6.98     | 6.46     |
| <b>5c</b>       | 56.94             | 6.57     | 6.64     | 57.08        | 6.51     | 6.91     |
| <b>6a</b>       | 61.82             | 7.43     | 6.55     | 61.25        | 7.06     | 6.73     |
| <b>6b</b>       | 59.81             | 6.73     | 5.58     | 59.81        | 6.43     | 5.66     |
| <b>6c</b>       | 62.48             | 6.67     | 6.62     | 62.30        | 6.56     | 6.70     |
| <b>7a</b>       | 61.82             | 7.55     | 6.55     | 62.03        | 7.43     | 6.60     |
| <b>7b</b>       | 60.39             | 7.49     | 6.12     | 60.56        | 7.40     | 6.21     |
| <b>7c</b>       | 59.33             | 7.02     | 6.29     | 59.24        | 7.13     | 6.40     |
| <b>10a</b>      | 66.26             | 7.01     | 6.72     | 66.06        | 6.97     | 6.81     |
| <b>10b</b>      | 60.58             | 7.25     | 5.89     | 60.32        | 6.97     | 5.95     |
| <b>10c</b>      | 61.60             | 6.63     | 6.25     | 61.56        | 6.44     | 6.26     |
| <b>11a</b>      | 62.23             | 7.38     | 6.31     | 62.13        | 7.29     | 6.32     |
| <b>11b</b>      | 60.82             | 7.34     | 5.91     | 60.82        | 7.33     | 6.00     |
| <b>11c</b>      | 59.80             | 6.87     | 6.06     | 59.56        | 6.85     | 6.08     |

**Table of Physical Properties of Novel Compounds**

| Compound   | Formula <sup>a</sup>                                                                                                  | mp, °C  |
|------------|-----------------------------------------------------------------------------------------------------------------------|---------|
| <b>4a</b>  | C <sub>20</sub> H <sub>24</sub> N <sub>2</sub> O <sub>3</sub> ·HCl·0.25H <sub>2</sub> O <sup>b</sup>                  | 232-235 |
| <b>4b</b>  | C <sub>21</sub> H <sub>26</sub> N <sub>2</sub> O <sub>4</sub> ·HCl·0.75H <sub>2</sub> O <sup>b</sup>                  | 195-197 |
| <b>4c</b>  | C <sub>20</sub> H <sub>23</sub> N <sub>2</sub> O <sub>3</sub> ·HCl·0.25H <sub>2</sub> O <sup>b</sup>                  | 244-246 |
| <b>5a</b>  | C <sub>20</sub> H <sub>26</sub> N <sub>2</sub> O <sub>2</sub> ·2HCl·0.75H <sub>2</sub> O <sup>b</sup>                 | 230-232 |
| <b>5b</b>  | C <sub>21</sub> H <sub>28</sub> N <sub>2</sub> O <sub>3</sub> ·2HCl·0.25H <sub>2</sub> O <sup>b</sup>                 | 235-237 |
| <b>5c</b>  | C <sub>20</sub> H <sub>25</sub> N <sub>2</sub> O <sub>2</sub> F·2HCl·0.25H <sub>2</sub> O <sup>b</sup>                | 248-250 |
| <b>6a</b>  | C <sub>22</sub> H <sub>28</sub> N <sub>2</sub> O <sub>3</sub> ·HCl·1.25H <sub>2</sub> O <sup>b</sup>                  | 129-132 |
| <b>6b</b>  | C <sub>23</sub> H <sub>30</sub> N <sub>2</sub> O <sub>4</sub> ·(COOH) <sub>2</sub> ·0.75H <sub>2</sub> O <sup>b</sup> | 119-121 |
| <b>6c</b>  | C <sub>22</sub> H <sub>27</sub> N <sub>2</sub> O <sub>3</sub> F·HCl·0.25H <sub>2</sub> O <sup>b</sup>                 | 126-129 |
| <b>7a</b>  | C <sub>22</sub> H <sub>30</sub> N <sub>2</sub> O <sub>2</sub> ·2HCl·0.75H <sub>2</sub> O <sup>b</sup>                 | 187-190 |
| <b>7b</b>  | C <sub>23</sub> H <sub>32</sub> N <sub>2</sub> O <sub>3</sub> ·2HCl·1.25H <sub>2</sub> O <sup>b</sup>                 | 174-176 |
| <b>7c</b>  | C <sub>22</sub> H <sub>29</sub> N <sub>2</sub> O <sub>2</sub> F·2HCl·0.25H <sub>2</sub> O <sup>b</sup>                | 210-213 |
| <b>10a</b> | C <sub>23</sub> H <sub>28</sub> N <sub>2</sub> O <sub>3</sub> ·HCl <sup>b</sup>                                       | 191-193 |
| <b>10b</b> | C <sub>24</sub> H <sub>30</sub> N <sub>2</sub> O <sub>4</sub> ·HCl·1.6H <sub>2</sub> O <sup>b</sup>                   | 188-190 |
| <b>10c</b> | C <sub>23</sub> H <sub>27</sub> N <sub>2</sub> O <sub>3</sub> F·HCl·0.75H <sub>2</sub> O <sup>b</sup>                 | 225-227 |
| <b>11a</b> | C <sub>23</sub> H <sub>30</sub> N <sub>2</sub> O <sub>2</sub> ·2HCl·0.25H <sub>2</sub> O <sup>b</sup>                 | 211-213 |
| <b>11b</b> | C <sub>24</sub> H <sub>32</sub> N <sub>2</sub> O <sub>3</sub> ·2HCl·0.25H <sub>2</sub> O <sup>b</sup>                 | 181-183 |
| <b>11c</b> | C <sub>23</sub> H <sub>29</sub> N <sub>2</sub> O <sub>2</sub> F·2HCl·0.25H <sub>2</sub> O <sup>b</sup>                | 230-232 |

<sup>a</sup>Elemental analyses for C, H, N were within ±0.4% of the theoretical values for the formulas given.

<sup>b</sup>Recrystallized from MeOH.
